# Supplementary material for: Comprehensive analysis of Distal-Less homeobox family gene expression in colon cancer
Source: Research Square preprint supplement (doi:10.21203/rs.3.rs-1723161/v1), 2022-07-05
Supplement: Supplementary file 1 [file 42afa9df38840156ae987eb6.xlsx]

## Sheet: Sheet1
DLX1
Characteristic	Low expression of DLX1	High expression of DLX1	p	statistic	method
n	239	239
T stage, n (%)			0.09	6.5	Chisq.test
T1	7 (1.5%)	4 (0.8%)
T2	39 (8.2%)	44 (9.2%)
T3	171 (35.8%)	152 (31.9%)
T4	22 (4.6%)	38 (8%)
N stage, n (%)			0.1	4.61	Chisq.test
N0	148 (31%)	136 (28.5%)
N1	57 (11.9%)	51 (10.7%)
N2	34 (7.1%)	52 (10.9%)
M stage, n (%)			0.703	0.15	Chisq.test
M0	176 (42.4%)	173 (41.7%)
M1	31 (7.5%)	35 (8.4%)
Pathologic stage, n (%)			0.519	2.27	Chisq.test
Stage I	38 (8.1%)	43 (9.2%)
Stage II	102 (21.8%)	85 (18.2%)
Stage III	64 (13.7%)	69 (14.8%)
Stage IV	31 (6.6%)	35 (7.5%)
Primary therapy outcome, n (%)			0.698		Fisher.test
PD	14 (5.6%)	11 (4.4%)
SD	3 (1.2%)	1 (0.4%)
PR	6 (2.4%)	7 (2.8%)
CR	102 (40.8%)	106 (42.4%)
Gender, n (%)			0.314	1.02	Chisq.test
Female	107 (22.4%)	119 (24.9%)
Male	132 (27.6%)	120 (25.1%)
Race, n (%)			0.589	1.06	Chisq.test
Asian	4 (1.3%)	7 (2.3%)
Black or African American	31 (10.1%)	32 (10.5%)
White	120 (39.2%)	112 (36.6%)
Age, n (%)			0.226	1.47	Chisq.test
<=65	104 (21.8%)	90 (18.8%)
>65	135 (28.2%)	149 (31.2%)
Weight, n (%)			0.461	0.54	Chisq.test
<=90	95 (34.8%)	94 (34.4%)
>90	47 (17.2%)	37 (13.6%)
Height, n (%)			0.997	0	Chisq.test
<170	66 (25.8%)	61 (23.8%)
>=170	66 (25.8%)	63 (24.6%)
BMI, n (%)			0.533	0.39	Chisq.test
<25	42 (16.4%)	45 (17.6%)
>=25	90 (35.2%)	79 (30.9%)
Residual tumor, n (%)			0.179		Fisher.test
R0	171 (45.7%)	175 (46.8%)
R1	0 (0%)	4 (1.1%)
R2	11 (2.9%)	13 (3.5%)
CEA level, n (%)			0.621	0.25	Chisq.test
<=5	97 (32%)	99 (32.7%)
>5	49 (16.2%)	58 (19.1%)
Perineural invasion, n (%)			0.763	0.09	Chisq.test
NO	65 (35.9%)	70 (38.7%)
YES	24 (13.3%)	22 (12.2%)
Lymphatic invasion, n (%)			0.758	0.1	Chisq.test
NO	134 (30.9%)	132 (30.4%)
YES	88 (20.3%)	80 (18.4%)
History of colon polyps, n (%)			0.302	1.07	Chisq.test
NO	132 (32.4%)	130 (31.9%)
YES	65 (15.9%)	81 (19.9%)
Neoplasm type, n (%)			1		Fisher.test
Colon adenocarcinoma	239 (50%)	239 (50%)
Rectum adenocarcinoma	0 (0%)	0 (0%)
Colon polyps present, n (%)			0.142	2.16	Chisq.test
NO	74 (29.7%)	88 (35.3%)
YES	49 (19.7%)	38 (15.3%)
Age, median (IQR)	68 (57.5, 75)	70 (60, 79)	0.021	25089.5	Wilcoxon
DLX2
Characteristic	Low expression of DLX2	High expression of DLX2	p	statistic	method
n	239	239
T stage, n (%)			0.375	3.11	Chisq.test
T1	6 (1.3%)	5 (1%)
T2	45 (9.4%)	38 (8%)
T3	163 (34.2%)	160 (33.5%)
T4	24 (5%)	36 (7.5%)
N stage, n (%)			0.2	3.22	Chisq.test
N0	150 (31.4%)	134 (28%)
N1	53 (11.1%)	55 (11.5%)
N2	36 (7.5%)	50 (10.5%)
M stage, n (%)			0.005	7.9	Chisq.test
M0	180 (43.4%)	169 (40.7%)
M1	21 (5.1%)	45 (10.8%)
Pathologic stage, n (%)			0.014	10.64	Chisq.test
Stage I	45 (9.6%)	36 (7.7%)
Stage II	100 (21.4%)	87 (18.6%)
Stage III	67 (14.3%)	66 (14.1%)
Stage IV	21 (4.5%)	45 (9.6%)
Primary therapy outcome, n (%)			0.036		Fisher.test
PD	12 (4.8%)	13 (5.2%)
SD	3 (1.2%)	1 (0.4%)
PR	2 (0.8%)	11 (4.4%)
CR	110 (44%)	98 (39.2%)
Gender, n (%)			0.927	0.01	Chisq.test
Female	112 (23.4%)	114 (23.8%)
Male	127 (26.6%)	125 (26.2%)
Race, n (%)			0.802	0.44	Chisq.test
Asian	5 (1.6%)	6 (2%)
Black or African American	33 (10.8%)	30 (9.8%)
White	127 (41.5%)	105 (34.3%)
Age, n (%)			0.226	1.47	Chisq.test
<=65	104 (21.8%)	90 (18.8%)
>65	135 (28.2%)	149 (31.2%)
Weight, n (%)			0.094	2.8	Chisq.test
<=90	97 (35.5%)	92 (33.7%)
>90	53 (19.4%)	31 (11.4%)
Height, n (%)			0.812	0.06	Chisq.test
<170	69 (27%)	58 (22.7%)
>=170	73 (28.5%)	56 (21.9%)
BMI, n (%)			0.207	1.6	Chisq.test
<25	43 (16.8%)	44 (17.2%)
>=25	99 (38.7%)	70 (27.3%)
Residual tumor, n (%)			0.002		Fisher.test
R0	174 (46.5%)	172 (46%)
R1	0 (0%)	4 (1.1%)
R2	5 (1.3%)	19 (5.1%)
CEA level, n (%)			0.252	1.31	Chisq.test
<=5	101 (33.3%)	95 (31.4%)
>5	47 (15.5%)	60 (19.8%)
Perineural invasion, n (%)			0.959	0	Chisq.test
NO	73 (40.3%)	62 (34.3%)
YES	24 (13.3%)	22 (12.2%)
Lymphatic invasion, n (%)			0.013	6.23	Chisq.test
NO	148 (34.1%)	118 (27.2%)
YES	72 (16.6%)	96 (22.1%)
History of colon polyps, n (%)			0.565	0.33	Chisq.test
NO	133 (32.6%)	129 (31.6%)
YES	69 (16.9%)	77 (18.9%)
Neoplasm type, n (%)			1		Fisher.test
Colon adenocarcinoma	239 (50%)	239 (50%)
Rectum adenocarcinoma	0 (0%)	0 (0%)
Colon polyps present, n (%)			1	0	Chisq.test
NO	87 (34.9%)	75 (30.1%)
YES	47 (18.9%)	40 (16.1%)
Age, median (IQR)	69 (57, 76)	69 (60, 78)	0.069	25817	Wilcoxon
DLX3
Characteristic	Low expression of DLX3	High expression of DLX3	p	statistic	method
n	239	239
T stage, n (%)			0.618	1.79	Chisq.test
T1	5 (1%)	6 (1.3%)
T2	40 (8.4%)	43 (9%)
T3	168 (35.2%)	155 (32.5%)
T4	26 (5.5%)	34 (7.1%)
N stage, n (%)			< 0.001	14.27	Chisq.test
N0	160 (33.5%)	124 (25.9%)
N1	50 (10.5%)	58 (12.1%)
N2	29 (6.1%)	57 (11.9%)
M stage, n (%)			< 0.001	14.77	Chisq.test
M0	183 (44.1%)	166 (40%)
M1	17 (4.1%)	49 (11.8%)
Pathologic stage, n (%)			< 0.001	26.91	Chisq.test
Stage I	41 (8.8%)	40 (8.6%)
Stage II	116 (24.8%)	71 (15.2%)
Stage III	62 (13.3%)	71 (15.2%)
Stage IV	17 (3.6%)	49 (10.5%)
Primary therapy outcome, n (%)			0.088		Fisher.test
PD	9 (3.6%)	16 (6.4%)
SD	0 (0%)	4 (1.6%)
PR	6 (2.4%)	7 (2.8%)
CR	109 (43.6%)	99 (39.6%)
Gender, n (%)			0.054	3.7	Chisq.test
Female	124 (25.9%)	102 (21.3%)
Male	115 (24.1%)	137 (28.7%)
Race, n (%)			0.971	0.06	Chisq.test
Asian	6 (2%)	5 (1.6%)
Black or African American	32 (10.5%)	31 (10.1%)
White	118 (38.6%)	114 (37.3%)
Age, n (%)			0.05	3.83	Chisq.test
<=65	86 (18%)	108 (22.6%)
>65	153 (32%)	131 (27.4%)
Weight, n (%)			0.29	1.12	Chisq.test
<=90	91 (33.3%)	98 (35.9%)
>90	47 (17.2%)	37 (13.6%)
Height, n (%)			0.045	4.01	Chisq.test
<170	73 (28.5%)	54 (21.1%)
>=170	57 (22.3%)	72 (28.1%)
BMI, n (%)			0.658	0.2	Chisq.test
<25	42 (16.4%)	45 (17.6%)
>=25	88 (34.4%)	81 (31.6%)
Residual tumor, n (%)			< 0.001		Fisher.test
R0	182 (48.7%)	164 (43.9%)
R1	2 (0.5%)	2 (0.5%)
R2	3 (0.8%)	21 (5.6%)
CEA level, n (%)			1	0	Chisq.test
<=5	94 (31%)	102 (33.7%)
>5	51 (16.8%)	56 (18.5%)
Perineural invasion, n (%)			0.968	0	Chisq.test
NO	67 (37%)	68 (37.6%)
YES	22 (12.2%)	24 (13.3%)
Lymphatic invasion, n (%)			0.365	0.82	Chisq.test
NO	143 (32.9%)	123 (28.3%)
YES	82 (18.9%)	86 (19.8%)
History of colon polyps, n (%)			0.616	0.25	Chisq.test
NO	130 (31.9%)	132 (32.4%)
YES	77 (18.9%)	69 (16.9%)
Neoplasm type, n (%)			1		Fisher.test
Colon adenocarcinoma	239 (50%)	239 (50%)
Rectum adenocarcinoma	0 (0%)	0 (0%)
Colon polyps present, n (%)			1	0	Chisq.test
NO	81 (32.5%)	81 (32.5%)
YES	44 (17.7%)	43 (17.3%)
Age, median (IQR)	69 (61, 78.5)	68 (55.5, 76)	0.012	32364	Wilcoxon
DLX4
Characteristic	Low expression of DLX4	High expression of DLX4	p	statistic	method
n	239	239
T stage, n (%)			0.309	3.59	Chisq.test
T1	4 (0.8%)	7 (1.5%)
T2	38 (8%)	45 (9.4%)
T3	171 (35.8%)	152 (31.9%)
T4	26 (5.5%)	34 (7.1%)
N stage, n (%)			0.336	2.18	Chisq.test
N0	148 (31%)	136 (28.5%)
N1	54 (11.3%)	54 (11.3%)
N2	37 (7.7%)	49 (10.3%)
M stage, n (%)			0.944	0	Chisq.test
M0	175 (42.2%)	174 (41.9%)
M1	34 (8.2%)	32 (7.7%)
Pathologic stage, n (%)			0.063	7.3	Chisq.test
Stage I	34 (7.3%)	47 (10.1%)
Stage II	107 (22.9%)	80 (17.1%)
Stage III	60 (12.8%)	73 (15.6%)
Stage IV	34 (7.3%)	32 (6.9%)
Primary therapy outcome, n (%)			0.618		Fisher.test
PD	12 (4.8%)	13 (5.2%)
SD	1 (0.4%)	3 (1.2%)
PR	5 (2%)	8 (3.2%)
CR	107 (42.8%)	101 (40.4%)
Gender, n (%)			0.647	0.21	Chisq.test
Female	110 (23%)	116 (24.3%)
Male	129 (27%)	123 (25.7%)
Race, n (%)			0.512	1.34	Chisq.test
Asian	4 (1.3%)	7 (2.3%)
Black or African American	30 (9.8%)	33 (10.8%)
White	121 (39.5%)	111 (36.3%)
Age, n (%)			0.926	0.01	Chisq.test
<=65	98 (20.5%)	96 (20.1%)
>65	141 (29.5%)	143 (29.9%)
Weight, n (%)			0.77	0.09	Chisq.test
<=90	96 (35.2%)	93 (34.1%)
>90	45 (16.5%)	39 (14.3%)
Height, n (%)			0.315	1.01	Chisq.test
<170	70 (27.3%)	57 (22.3%)
>=170	62 (24.2%)	67 (26.2%)
BMI, n (%)			0.25	1.32	Chisq.test
<25	40 (15.6%)	47 (18.4%)
>=25	92 (35.9%)	77 (30.1%)
Residual tumor, n (%)			0.243		Fisher.test
R0	181 (48.4%)	165 (44.1%)
R1	1 (0.3%)	3 (0.8%)
R2	9 (2.4%)	15 (4%)
CEA level, n (%)			0.55	0.36	Chisq.test
<=5	85 (28.1%)	111 (36.6%)
>5	51 (16.8%)	56 (18.5%)
Perineural invasion, n (%)			0.903	0.01	Chisq.test
NO	65 (35.9%)	70 (38.7%)
YES	21 (11.6%)	25 (13.8%)
Lymphatic invasion, n (%)			0.498	0.46	Chisq.test
NO	140 (32.3%)	126 (29%)
YES	82 (18.9%)	86 (19.8%)
History of colon polyps, n (%)			0.417	0.66	Chisq.test
NO	124 (30.4%)	138 (33.8%)
YES	76 (18.6%)	70 (17.2%)
Neoplasm type, n (%)			1		Fisher.test
Colon adenocarcinoma	239 (50%)	239 (50%)
Rectum adenocarcinoma	0 (0%)	0 (0%)
Colon polyps present, n (%)			0.963	0	Chisq.test
NO	80 (32.1%)	82 (32.9%)
YES	44 (17.7%)	43 (17.3%)
Age, median (IQR)	69 (58, 76)	68 (58.5, 78)	0.484	27503.5	Wilcoxon
DLX5
Characteristic	Low expression of DLX5	High expression of DLX5	p	statistic	method
n	239	239
T stage, n (%)			< 0.001	17.26	Chisq.test
T1	6 (1.3%)	5 (1%)
T2	56 (11.7%)	27 (5.7%)
T3	156 (32.7%)	167 (35%)
T4	20 (4.2%)	40 (8.4%)
N stage, n (%)			< 0.001	21.17	Chisq.test
N0	165 (34.5%)	119 (24.9%)
N1	47 (9.8%)	61 (12.8%)
N2	27 (5.6%)	59 (12.3%)
M stage, n (%)			0.005	7.83	Chisq.test
M0	185 (44.6%)	164 (39.5%)
M1	22 (5.3%)	44 (10.6%)
Pathologic stage, n (%)			< 0.001	24.08	Chisq.test
Stage I	56 (12%)	25 (5.4%)
Stage II	100 (21.4%)	87 (18.6%)
Stage III	55 (11.8%)	78 (16.7%)
Stage IV	22 (4.7%)	44 (9.4%)
Primary therapy outcome, n (%)			0.005		Fisher.test
PD	5 (2%)	20 (8%)
SD	3 (1.2%)	1 (0.4%)
PR	7 (2.8%)	6 (2.4%)
CR	114 (45.6%)	94 (37.6%)
Gender, n (%)			0.314	1.02	Chisq.test
Female	107 (22.4%)	119 (24.9%)
Male	132 (27.6%)	120 (25.1%)
Race, n (%)			0.3		Fisher.test
Asian	7 (2.3%)	4 (1.3%)
Black or African American	24 (7.8%)	39 (12.7%)
White	101 (33%)	131 (42.8%)
Age, n (%)			< 0.001	13.2	Chisq.test
<=65	77 (16.1%)	117 (24.5%)
>65	162 (33.9%)	122 (25.5%)
Weight, n (%)			0.354	0.86	Chisq.test
<=90	85 (31.1%)	104 (38.1%)
>90	32 (11.7%)	52 (19%)
Height, n (%)			0.321	0.99	Chisq.test
<170	57 (22.3%)	70 (27.3%)
>=170	49 (19.1%)	80 (31.2%)
BMI, n (%)			0.898	0.02	Chisq.test
<25	37 (14.5%)	50 (19.5%)
>=25	69 (27%)	100 (39.1%)
Residual tumor, n (%)			0.533		Fisher.test
R0	177 (47.3%)	169 (45.2%)
R1	1 (0.3%)	3 (0.8%)
R2	11 (2.9%)	13 (3.5%)
CEA level, n (%)			0.133	2.26	Chisq.test
<=5	96 (31.7%)	100 (33%)
>5	42 (13.9%)	65 (21.5%)
Perineural invasion, n (%)			0.023	5.17	Chisq.test
NO	63 (34.8%)	72 (39.8%)
YES	12 (6.6%)	34 (18.8%)
Lymphatic invasion, n (%)			< 0.001	14.88	Chisq.test
NO	150 (34.6%)	116 (26.7%)
YES	62 (14.3%)	106 (24.4%)
History of colon polyps, n (%)			0.009	6.9	Chisq.test
NO	121 (29.7%)	141 (34.6%)
YES	88 (21.6%)	58 (14.2%)
Neoplasm type, n (%)			1		Fisher.test
Colon adenocarcinoma	239 (50%)	239 (50%)
Rectum adenocarcinoma	0 (0%)	0 (0%)
Colon polyps present, n (%)			0.054	3.73	Chisq.test
NO	60 (24.1%)	102 (41%)
YES	44 (17.7%)	43 (17.3%)
Age, median (IQR)	71 (62.5, 78)	66 (54.5, 75.5)	< 0.001	34317.5	Wilcoxon
DLX6
Characteristic	Low expression of DLX6	High expression of DLX6	p	statistic	method
n	239	239
T stage, n (%)			0.119	5.86	Chisq.test
T1	2 (0.4%)	9 (1.9%)
T2	40 (8.4%)	43 (9%)
T3	169 (35.4%)	154 (32.3%)
T4	27 (5.7%)	33 (6.9%)
N stage, n (%)			0.567	1.13	Chisq.test
N0	147 (30.8%)	137 (28.7%)
N1	53 (11.1%)	55 (11.5%)
N2	39 (8.2%)	47 (9.8%)
M stage, n (%)			1	0	Chisq.test
M0	179 (43.1%)	170 (41%)
M1	34 (8.2%)	32 (7.7%)
Pathologic stage, n (%)			0.479	2.48	Chisq.test
Stage I	38 (8.1%)	43 (9.2%)
Stage II	101 (21.6%)	86 (18.4%)
Stage III	61 (13.1%)	72 (15.4%)
Stage IV	34 (7.3%)	32 (6.9%)
Primary therapy outcome, n (%)			0.892		Fisher.test
PD	12 (4.8%)	13 (5.2%)
SD	2 (0.8%)	2 (0.8%)
PR	7 (2.8%)	6 (2.4%)
CR	92 (36.8%)	116 (46.4%)
Gender, n (%)			0.647	0.21	Chisq.test
Female	110 (23%)	116 (24.3%)
Male	129 (27%)	123 (25.7%)
Race, n (%)			0.054	5.85	Chisq.test
Asian	8 (2.6%)	3 (1%)
Black or African American	25 (8.2%)	38 (12.4%)
White	124 (40.5%)	108 (35.3%)
Age, n (%)			0.78	0.08	Chisq.test
<=65	95 (19.9%)	99 (20.7%)
>65	144 (30.1%)	140 (29.3%)
Weight, n (%)			0.299	1.08	Chisq.test
<=90	89 (32.6%)	100 (36.6%)
>90	46 (16.8%)	38 (13.9%)
Height, n (%)			0.104	2.64	Chisq.test
<170	70 (27.3%)	57 (22.3%)
>=170	57 (22.3%)	72 (28.1%)
BMI, n (%)			1	0	Chisq.test
<25	43 (16.8%)	44 (17.2%)
>=25	84 (32.8%)	85 (33.2%)
Residual tumor, n (%)			1		Fisher.test
R0	168 (44.9%)	178 (47.6%)
R1	2 (0.5%)	2 (0.5%)
R2	12 (3.2%)	12 (3.2%)
CEA level, n (%)			0.412	0.67	Chisq.test
<=5	99 (32.7%)	97 (32%)
>5	48 (15.8%)	59 (19.5%)
Perineural invasion, n (%)			0.372	0.8	Chisq.test
NO	67 (37%)	68 (37.6%)
YES	27 (14.9%)	19 (10.5%)
Lymphatic invasion, n (%)			0.826	0.05	Chisq.test
NO	134 (30.9%)	132 (30.4%)
YES	82 (18.9%)	86 (19.8%)
History of colon polyps, n (%)			0.724	0.12	Chisq.test
NO	130 (31.9%)	132 (32.4%)
YES	69 (16.9%)	77 (18.9%)
Neoplasm type, n (%)			1		Fisher.test
Colon adenocarcinoma	239 (50%)	239 (50%)
Rectum adenocarcinoma	0 (0%)	0 (0%)
Colon polyps present, n (%)			0.963	0	Chisq.test
NO	80 (32.1%)	82 (32.9%)
YES	44 (17.7%)	43 (17.3%)
Age, median (IQR)	69 (59, 77)	68 (57, 77.5)	0.547	29470.5	Wilcoxon
