# Supplementary material for: Comprehensive analysis of Distal-Less homeobox family gene expression in colon cancer
Source: Research Square preprint supplement (doi:10.21203/rs.3.rs-1723161/v1), 2022-07-05
Supplement: Supplementary file 2 [file 60f67bff170496a32688d1b2.xlsx]

## Sheet: Sheet1
Gene names
DLX2
KLF14
CHRND
KCNN1
IGDCC3
ARHGAP36
NCAN
TFAP2B
CNPY1
CACNG7
ZDHHC22
RIMS4
SYT6
SLC38A8
CLDN19
NEUROD1
TLCD3B
CER1
SHISA7
NEUROD4
LHX3
AL035425.2
DEFB106B
TCP11X1
SPATA31A5
MAFA
HCN4
SBK2
SLITRK1
PCSK2
DLX1
TNFRSF19
NELL2
HS3ST4
VWA5B2
SEZ6
DLX4
BSX
MYH7B
PRR9
FGF20
OR12D2
KRTAP4-6
NXF2B
C1QL4
NOTUM
NKD1
APCDD1
ADAMTSL2
LRRC43
CAB39L
ABCC2
FGF19
C10orf82
WNT6
ETNK2
NXPH3
KRT23
F10
KRT35
SYT7
FGF18
KRT31
SLC30A2
VENTX
SLC22A11
LY6G6D
SLC38A3
PTP4A3
PRSS56
KRT37
DLX3
TTLL4
DNMT3B
CDK5R1
IGF2BP1
STK36
UNK
AMER3
PHF12
WNT3
DBF4B
ZNF385C
BCORL1
PRDM11
ASPSCR1
CELSR2
QSOX2
DNMT3A
PABPC1L
BCAM
ATXN7L2
CHST13
SRCIN1
PIP4K2B
LMX1A
MAGEF1
EDC3
DYNC1I1
DLX6
RASL11B
ID4
SP7
AMBN
MYL3
ISM1
SERPINI1
ATOH8
FOXC2
TRIM71
HEY1
OLFML3
FXYD1
CILP2
SMAD7
FGF1
FZD7
IVL
MGP
FBXO17
TNFAIP8L3
RTL5
COMP
MFAP2
DLX5
SH3GL2
SLC46A1
PGBD5
GAL
COCH
AXIN2
CKB
OGDHL
AKAP7
SLC38A4
TTPA
STRIT1
TESMIN
ELAVL2
HAVCR1
DMRT2
ZNF620
PHYHIPL
SATB2
METAP1D
CWH43
MTARC1
