# Supplementary material for: Comprehensive analysis of Distal-Less homeobox family gene expression in colon cancer
Source: Research Square preprint supplement (doi:10.21203/rs.3.rs-1723161/v1), 2022-07-05
Supplement: Supplementary file 3 [file f7b5e7668cc1c213904c7303.xlsx]

## Sheet: Sheet 1
Table S3. GO and KEGG analysis of genes associated with DLX genes.
ONTOLOGY	ID	Description	GeneRatio	BgRatio	pvalue	p.adjust	qvalue	geneID	Count
BP	GO:0007389	pattern specification process	15/135	446/18670	8.35239e-07	0.00160245	0.00145478	DLX1/DLX2/CELSR2/FGF1/FOXC2/NEUROD1/WNT3/WNT6/LHX3/AXIN2/CER1/DMRT2/SATB2/HEY1/NKD1	15
BP	GO:0003002	regionalization	13/135	351/18670	1.63265e-06	0.00160245	0.00145478	DLX1/DLX2/CELSR2/FGF1/FOXC2/NEUROD1/WNT3/LHX3/AXIN2/CER1/DMRT2/HEY1/NKD1	13
BP	GO:0048705	skeletal system morphogenesis	10/135	239/18670	9.52626e-06	0.00623335	0.00565893	COMP/COCH/DLX2/DLX5/FOXC2/MGP/AXIN2/FGF18/CER1/SATB2	10
BP	GO:0060350	endochondral bone morphogenesis	6/135	73/18670	1.46273e-05	0.00717837	0.00651687	COMP/COCH/DLX5/AXIN2/FGF18/CER1	6
BP	GO:0021766	hippocampus development	6/135	81/18670	2.65995e-05	0.0076225	0.00692007	DLX1/DLX2/ID4/LMX1A/NEUROD1/CDK5R1	6
BP	GO:0045165	cell fate commitment	10/135	270/18670	2.72995e-05	0.0076225	0.00692007	DLX1/DLX2/FOXC2/NEUROD1/WNT3/WNT6/LHX3/FZD7/SATB2/NEUROD4	10
BP	GO:0061448	connective tissue development	10/135	273/18670	2.9993e-05	0.0076225	0.00692007	COMP/COCH/DLX2/FOXC2/ID4/MGP/AXIN2/FGF18/CER1/SATB2	10
BP	GO:0009952	anterior/posterior pattern specification	9/135	219/18670	3.10647e-05	0.0076225	0.00692007	CELSR2/FOXC2/NEUROD1/WNT3/AXIN2/CER1/DMRT2/HEY1/NKD1	9
BP	GO:0021877	forebrain neuron fate commitment	3/135	10/18670	4.27521e-05	0.00932471	0.00846542	DLX1/DLX2/SATB2	3
BP	GO:0043588	skin development	12/135	419/18670	5.36606e-05	0.0100188	0.00909556	COMP/IVL/KRT31/KRT35/TFAP2B/KRT37/KRT23/GAL/TNFRSF19/KRTAP4-6/APCDD1/PRR9	12
BP	GO:0021953	central nervous system neuron differentiation	8/135	183/18670	5.61421e-05	0.0100188	0.00909556	DLX1/DLX2/DLX5/ID4/LMX1A/WNT3/LHX3/SATB2	8
BP	GO:0003407	neural retina development	5/135	62/18670	8.53153e-05	0.0139562	0.0126701	DLX1/DLX2/NEUROD1/TFAP2B/NEUROD4	5
BP	GO:0048715	negative regulation of oligodendrocyte differentiation	3/135	13/18670	0.000100284	0.0151429	0.0137474	DLX1/DLX2/ID4	3
BP	GO:0021761	limbic system development	6/135	109/18670	0.00014071	0.0185408	0.0168322	DLX1/DLX2/ID4/LMX1A/NEUROD1/CDK5R1	6
BP	GO:0051216	cartilage development	8/135	209/18670	0.000141677	0.0185408	0.0168322	COMP/COCH/DLX2/MGP/AXIN2/FGF18/CER1/SATB2	8
BP	GO:0001503	ossification	11/135	398/18670	0.00015155	0.0185932	0.0168798	COMP/DLX5/FOXC2/ID4/MGP/WNT3/AXIN2/FGF18/CER1/SATB2/SP7	11
BP	GO:0060349	bone morphogenesis	6/135	114/18670	0.000179936	0.0201324	0.0182772	COMP/COCH/DLX5/AXIN2/FGF18/CER1	6
BP	GO:0031214	biomineral tissue development	7/135	163/18670	0.000184607	0.0201324	0.0182772	AMBN/COMP/MGP/WNT6/AXIN2/CER1/HEY1	7
BP	GO:0048844	artery morphogenesis	5/135	76/18670	0.000224664	0.0232113	0.0210723	COMP/FOXC2/SMAD7/TFAP2B/HEY1	5
BP	GO:0021543	pallium development	7/135	172/18670	0.000256645	0.0251897	0.0228684	DLX1/DLX2/ID4/LMX1A/NEUROD1/CDK5R1/IGF2BP1	7
BP	GO:0090287	regulation of cellular response to growth factor stimulus	9/135	292/18670	0.000277206	0.0259121	0.0235243	DLX1/FGF1/SMAD7/TFAP2B/FGF18/CER1/ADAMTSL2/PTP4A3/RASL11B	9
BP	GO:0001654	eye development	10/135	362/18670	0.000305603	0.0272681	0.0247553	DLX1/DLX2/FOXC2/MFAP2/NEUROD1/TFAP2B/WNT6/NEUROD4/NKD1/PRSS56	10
BP	GO:0150063	visual system development	10/135	366/18670	0.000333365	0.028452	0.02583	DLX1/DLX2/FOXC2/MFAP2/NEUROD1/TFAP2B/WNT6/NEUROD4/NKD1/PRSS56	10
BP	GO:0060351	cartilage development involved in endochondral bone morphogenesis	4/135	47/18670	0.000366458	0.0289031	0.0262397	COMP/COCH/AXIN2/CER1	4
BP	GO:0048880	sensory system development	10/135	371/18670	0.000371003	0.0289031	0.0262397	DLX1/DLX2/FOXC2/MFAP2/NEUROD1/TFAP2B/WNT6/NEUROD4/NKD1/PRSS56	10
BP	GO:0042476	odontogenesis	6/135	132/18670	0.000397367	0.0289031	0.0262397	AMBN/DLX1/DLX2/DLX3/WNT6/AXIN2	6
BP	GO:0002063	chondrocyte development	4/135	48/18670	0.000397547	0.0289031	0.0262397	COMP/COCH/AXIN2/FGF18	4
BP	GO:0030900	forebrain development	10/135	381/18670	0.000456977	0.0320373	0.029085	DLX1/DLX2/DLX5/ID4/LMX1A/NEUROD1/LHX3/CDK5R1/IGF2BP1/SATB2	10
BP	GO:0021537	telencephalon development	8/135	251/18670	0.00048725	0.0322603	0.0292875	DLX1/DLX2/DLX5/ID4/LMX1A/NEUROD1/CDK5R1/IGF2BP1	8
BP	GO:0042475	odontogenesis of dentin-containing tooth	5/135	90/18670	0.000493026	0.0322603	0.0292875	AMBN/DLX1/DLX2/DLX3/WNT6	5
BP	GO:0072073	kidney epithelium development	6/135	140/18670	0.00054326	0.0344006	0.0312305	FGF1/FOXC2/SMAD7/TFAP2B/WNT6/CER1	6
BP	GO:0021879	forebrain neuron differentiation	4/135	53/18670	0.000581814	0.0356907	0.0324017	DLX1/DLX2/DLX5/SATB2	4
BP	GO:0021895	cerebral cortex neuron differentiation	3/135	24/18670	0.000669566	0.0396722	0.0360163	DLX1/DLX2/ID4	3
BP	GO:0001657	ureteric bud development	5/135	97/18670	0.000694421	0.0396722	0.0360163	FGF1/FOXC2/SMAD7/WNT6/CER1	5
BP	GO:0072163	mesonephric epithelium development	5/135	98/18670	0.00072756	0.0396722	0.0360163	FGF1/FOXC2/SMAD7/WNT6/CER1	5
BP	GO:0072164	mesonephric tubule development	5/135	98/18670	0.00072756	0.0396722	0.0360163	FGF1/FOXC2/SMAD7/WNT6/CER1	5
BP	GO:0060840	artery development	5/135	100/18670	0.000797368	0.0423036	0.0384052	COMP/FOXC2/SMAD7/TFAP2B/HEY1	5
BP	GO:0055083	monovalent inorganic anion homeostasis	3/135	26/18670	0.000851078	0.0427963	0.0388525	CKB/ABCC2/TFAP2B	3
BP	GO:0001823	mesonephros development	5/135	102/18670	0.000872058	0.0427963	0.0388525	FGF1/FOXC2/SMAD7/WNT6/CER1	5
BP	GO:0021549	cerebellum development	5/135	102/18670	0.000872058	0.0427963	0.0388525	CKB/LMX1A/NEUROD1/CDK5R1/SEZ6	5
BP	GO:0010721	negative regulation of cell development	9/135	344/18670	0.000901652	0.0431693	0.0391912	DLX1/DLX2/ID4/LMX1A/TTPA/WNT3/CDK5R1/HEY1/GAL	9
BP	GO:0015893	drug transport	7/135	214/18670	0.000945402	0.0441863	0.0401144	ABCC2/SYT7/SLC38A3/FGF20/GAL/SLC46A1/SYT6	7
BP	GO:0030509	BMP signaling pathway	6/135	157/18670	0.000989679	0.0445095	0.0404079	COMP/DLX1/DLX5/SMAD7/TFAP2B/CER1	6
BP	GO:0007178	transmembrane receptor protein serine/threonine kinase signaling pathway	9/135	349/18670	0.000997667	0.0445095	0.0404079	COMP/DLX1/DLX5/SMAD7/TFAP2B/CER1/ADAMTSL2/RASL11B/ATOH8	9
BP	GO:0045686	negative regulation of glial cell differentiation	3/135	28/18670	0.0010611	0.0462875	0.042022	DLX1/DLX2/ID4	3
BP	GO:0048663	neuron fate commitment	4/135	65/18670	0.00125825	0.0521129	0.0473106	DLX1/DLX2/LHX3/SATB2	4
BP	GO:0045665	negative regulation of neuron differentiation	7/135	225/18670	0.001264	0.0521129	0.0473106	DLX1/DLX2/ID4/LMX1A/WNT3/CDK5R1/HEY1	7
BP	GO:0022037	metencephalon development	5/135	111/18670	0.00127428	0.0521129	0.0473106	CKB/LMX1A/NEUROD1/CDK5R1/SEZ6	5
BP	GO:0070268	cornification	5/135	112/18670	0.0013262	0.0522945	0.0474754	IVL/KRT31/KRT35/KRT37/KRT23	5
BP	GO:0021872	forebrain generation of neurons	4/135	66/18670	0.001332	0.0522945	0.0474754	DLX1/DLX2/DLX5/SATB2	4
BP	GO:0008543	fibroblast growth factor receptor signaling pathway	5/135	114/18670	0.00143469	0.0551587	0.0500757	FGF1/FGF18/FGF19/FGF20/TRIM71	5
BP	GO:0071772	response to BMP	6/135	170/18670	0.00148926	0.0551587	0.0500757	COMP/DLX1/DLX5/SMAD7/TFAP2B/CER1	6
BP	GO:0071773	cellular response to BMP stimulus	6/135	170/18670	0.00148926	0.0551587	0.0500757	COMP/DLX1/DLX5/SMAD7/TFAP2B/CER1	6
BP	GO:0045666	positive regulation of neuron differentiation	9/135	371/18670	0.00152382	0.0553938	0.0502891	DLX1/DLX2/DNMT3B/NEUROD1/SERPINI1/WNT3/FGF20/CACNG7/SLITRK1	9
BP	GO:0060560	developmental growth involved in morphogenesis	7/135	235/18670	0.00162154	0.0578743	0.0525411	FGF1/SH3GL2/WNT3/CDK5R1/GAL/CACNG7/NKD1	7
BP	GO:0001756	somitogenesis	4/135	70/18670	0.00165731	0.0580945	0.052741	FOXC2/AXIN2/DMRT2/NKD1	4
BP	GO:0051897	positive regulation of protein kinase B signaling	6/135	176/18670	0.00177599	0.0611627	0.0555264	F10/FGF1/FGF18/FGF19/FGF20/TNFAIP8L3	6
BP	GO:0003208	cardiac ventricle morphogenesis	4/135	73/18670	0.00193485	0.0654847	0.0594502	FOXC2/SMAD7/MYL3/HEY1	4
BP	GO:0008544	epidermis development	10/135	464/18670	0.0020245	0.0668734	0.0607108	IVL/KRT31/KRT35/KRT37/KRT23/GAL/TNFRSF19/KRTAP4-6/APCDD1/PRR9	10
BP	GO:0043010	camera-type eye development	8/135	314/18670	0.00204923	0.0668734	0.0607108	DLX1/DLX2/FOXC2/NEUROD1/TFAP2B/WNT6/NEUROD4/PRSS56	8
BP	GO:0003417	growth plate cartilage development	3/135	36/18670	0.00221719	0.0668734	0.0607108	COMP/COCH/CER1	3
BP	GO:0048706	embryonic skeletal system development	5/135	126/18670	0.00222813	0.0668734	0.0607108	DLX1/DLX2/FOXC2/DMRT2/SATB2	5
BP	GO:0090101	negative regulation of transmembrane receptor protein serine/threonine kinase signaling pathway	5/135	126/18670	0.00222813	0.0668734	0.0607108	DLX1/SMAD7/CER1/ADAMTSL2/RASL11B	5
BP	GO:0035768	endothelial cell chemotaxis to fibroblast growth factor	2/135	10/18670	0.00224842	0.0668734	0.0607108	FGF1/FGF18	2
BP	GO:0046532	regulation of photoreceptor cell differentiation	2/135	10/18670	0.00224842	0.0668734	0.0607108	DLX1/DLX2	2
BP	GO:2000544	regulation of endothelial cell chemotaxis to fibroblast growth factor	2/135	10/18670	0.00224842	0.0668734	0.0607108	FGF1/FGF18	2
BP	GO:0071542	dopaminergic neuron differentiation	3/135	37/18670	0.00240017	0.0703213	0.063841	LMX1A/WNT3/FGF20	3
BP	GO:0021892	cerebral cortex GABAergic interneuron differentiation	2/135	11/18670	0.00273507	0.0766992	0.0696312	DLX1/DLX2	2
BP	GO:0035766	cell chemotaxis to fibroblast growth factor	2/135	11/18670	0.00273507	0.0766992	0.0696312	FGF1/FGF18	2
BP	GO:1904847	regulation of cell chemotaxis to fibroblast growth factor	2/135	11/18670	0.00273507	0.0766992	0.0696312	FGF1/FGF18	2
BP	GO:0048713	regulation of oligodendrocyte differentiation	3/135	39/18670	0.00279352	0.0768214	0.0697421	DLX1/DLX2/ID4	3
BP	GO:0007219	Notch signaling pathway	6/135	193/18670	0.0028177	0.0768214	0.0697421	DLX1/DLX2/FOXC2/PTP4A3/HEY1/NEUROD4	6
BP	GO:0014046	dopamine secretion	3/135	40/18670	0.00300419	0.0796922	0.0723484	SYT7/FGF20/SYT6	3
BP	GO:0014059	regulation of dopamine secretion	3/135	40/18670	0.00300419	0.0796922	0.0723484	SYT7/FGF20/SYT6	3
BP	GO:1903845	negative regulation of cellular response to transforming growth factor beta stimulus	4/135	83/18670	0.00309042	0.0808865	0.0734326	DLX1/SMAD7/ADAMTSL2/RASL11B	4
BP	GO:0030002	cellular anion homeostasis	2/135	12/18670	0.00326657	0.0832764	0.0756023	CKB/ABCC2	2
BP	GO:0030320	cellular monovalent inorganic anion homeostasis	2/135	12/18670	0.00326657	0.0832764	0.0756023	CKB/ABCC2	2
BP	GO:0045746	negative regulation of Notch signaling pathway	3/135	43/18670	0.00369383	0.0929615	0.0843949	DLX1/DLX2/HEY1	3
BP	GO:0044344	cellular response to fibroblast growth factor stimulus	5/135	143/18670	0.00384364	0.0939413	0.0852844	FGF1/FGF18/FGF19/FGF20/TRIM71	5
BP	GO:0003416	endochondral bone growth	3/135	44/18670	0.00394336	0.0939413	0.0852844	COMP/COCH/CER1	3
BP	GO:0060041	retina development in camera-type eye	5/135	144/18670	0.00395923	0.0939413	0.0852844	DLX1/DLX2/NEUROD1/TFAP2B/NEUROD4	5
BP	GO:0048568	embryonic organ development	9/135	428/18670	0.00396341	0.0939413	0.0852844	DLX2/DLX5/DLX6/FOXC2/MFAP2/NEUROD1/TTPA/SATB2/HEY1	9
BP	GO:0061053	somite development	4/135	89/18670	0.00397205	0.0939413	0.0852844	FOXC2/AXIN2/DMRT2/NKD1	4
BP	GO:0014014	negative regulation of gliogenesis	3/135	45/18670	0.00420292	0.0982182	0.0891672	DLX1/DLX2/ID4	3
BP	GO:0030510	regulation of BMP signaling pathway	4/135	91/18670	0.00430008	0.0993064	0.0901551	DLX1/SMAD7/TFAP2B/CER1	4
CC	GO:0099699	integral component of synaptic membrane	6/138	152/19717	0.000708382	0.093807	0.0864012	CHRND/SYT7/CACNG7/SLITRK1/SYT6/SHISA7	6
CC	GO:0099240	intrinsic component of synaptic membrane	6/138	164/19717	0.00105167	0.093807	0.0864012	CHRND/SYT7/CACNG7/SLITRK1/SYT6/SHISA7	6
CC	GO:0098686	hippocampal mossy fiber to CA3 synapse	3/138	34/19717	0.00171266	0.093807	0.0864012	SH3GL2/SYT7/AKAP7	3
CC	GO:0099060	integral component of postsynaptic specialization membrane	4/138	74/19717	0.0018093	0.093807	0.0864012	CHRND/CACNG7/SLITRK1/SHISA7	4
CC	GO:0098948	intrinsic component of postsynaptic specialization membrane	4/138	77/19717	0.00209391	0.093807	0.0864012	CHRND/CACNG7/SLITRK1/SHISA7	4
CC	GO:0043025	neuronal cell body	10/138	497/19717	0.00264135	0.0986105	0.0908254	CKB/KCNN1/PCSK2/SERPINI1/SH3GL2/CDK5R1/GAL/CACNG7/SRCIN1/SEZ6	10
MF	GO:0001228	DNA-binding transcription activator activity, RNA polymerase II-specific	13/128	439/17697	1.79619e-05	0.00453609	0.00421854	DLX2/DLX3/DLX5/FOXC2/LMX1A/NEUROD1/TFAP2B/LHX3/SATB2/VENTX/SP7/KLF14/MAFA	13
MF	GO:0005104	fibroblast growth factor receptor binding	4/128	25/17697	2.93598e-05	0.00453609	0.00421854	FGF1/FGF18/FGF19/FGF20	4
KEGG	hsa05224	Breast cancer	9/54	147/8076	4.54381e-07	3.77136e-05	3.06109e-05	FGF1/WNT3/WNT6/AXIN2/FZD7/FGF18/FGF19/HEY1/FGF20	9
KEGG	hsa05226	Gastric cancer	8/54	149/8076	5.64326e-06	0.000234195	0.000190089	FGF1/WNT3/WNT6/AXIN2/FZD7/FGF18/FGF19/FGF20	8
KEGG	hsa04390	Hippo signaling pathway	7/54	157/8076	7.54929e-05	0.00176566	0.00143313	FGF1/SMAD7/WNT3/WNT6/AXIN2/FZD7/NKD1	7
KEGG	hsa04310	Wnt signaling pathway	7/54	160/8076	8.50922e-05	0.00176566	0.00143313	WNT3/WNT6/AXIN2/FZD7/CER1/NKD1/NOTUM	7
KEGG	hsa04550	Signaling pathways regulating pluripotency of stem cells	6/54	143/8076	0.000356092	0.00591113	0.00479787	DLX5/ID4/WNT3/WNT6/AXIN2/FZD7	6
KEGG	hsa05217	Basal cell carcinoma	4/54	63/8076	0.000794148	0.0109857	0.00891675	WNT3/WNT6/AXIN2/FZD7	4
KEGG	hsa05218	Melanoma	4/54	72/8076	0.00131205	0.0155571	0.0126272	FGF1/FGF18/FGF19/FGF20	4
KEGG	hsa05150	Staphylococcus aureus infection	4/54	96/8076	0.00376462	0.0390579	0.031702	KRT31/KRT35/KRT37/KRT23	4
